# Supplementary material for: A new fossil assemblage shows that large angiosperm trees grew in North America by the Turonian (Late Cretaceous)
Source: PubMed Central journal article supplement — Sci Adv. 2018 Sep 26;4(9):eaar8568. doi: 10.1126/sciadv.aar8568 (PMC6157959; doi:10.1126/sciadv.aar8568), 2018-09-26
Supplement: aar8568_SM.pdf [file aar8568_SM.pdf]

## Supplementary Materials for

### **A new fossil assemblage shows that large angiosperm trees grew in North America by the Turonian (Late Cretaceous)**

Nathan A. Jud\*, Michael D. D’Emic, Scott A. Williams, Josh C. Mathews, Katie M. Tremaine, Janok Bhattacharya

\*Corresponding author. Email: [nathan.jud@cornell.edu](mailto:nathan.jud@cornell.edu)

Published 26 September 2018, *Sci. Adv.* **4**, eaar8568 (2018)

DOI: [10.1126/sciadv.aar8568](https://doi.org/10.1126/sciadv.aar8568)

#### **The PDF file includes:**

Table S1. Comparison of the Cretaceous *Paraphyllanthoxylon* species and the anatomically similar genus *Aplectotremas*.

Legend for data file S1

References (39–51)

#### **Other Supplementary Material for this manuscript includes the following:**

(available at [advances.sciencemag.org/cgi/content/full/4/9/eaar8568/DC1](https://advances.sciencemag.org/cgi/content/full/4/9/eaar8568/DC1))

Data file S1. Cretaceous angiosperm wood fossils used to create Fig. 1 (Excel file).

**Table S1. Comparison of the Cretaceous *Paraphyllanthoxylon* species and the anatomically similar genus *Aplectotremas*.** The specimen from the Ferron Sandstone Member and the type species are in bold (*11–14, 39–51*). Abbreviations: Al = Albian, Ce = Cenomanian, Tu = Turonian, Co = Coniacian, Sa = Santonian, Ca = Campanian, Ma = Maastrichtian; GR = growth rings, (-) indistinct, (+) distinct; PP = perforation plates, (-) simple, (+) scalariform; %S = percent solitary vessels; MVG = maximum number of vessels in radial multiples; MTD = mean tangential vessel diameter (µm; ranges obtained from multiple specimens); VF = vessels frequency (ranges obtained from multiple specimens); Ty = Tyloses: 1 = bubble-like, 2 = segmenting vessel, 3 = sclerotic; AP = axial parenchyma, 1 = rare to scanty paratracheal, 2 = diffuse or diffuse-in-aggregates; 1-r = uniseriate rays, (-) rare, (+) common; MR = maximum multiseriate ray width; RCC = ray cellular composition, 1 = mixed upright & procumbent, 2 = homocellular, procumbent; MU = rows of marginal upright cells associated with rays; 1 = one or rarely two rows of marginal uprights, 2 = commonly two or more rows of marginal upright cells; RF = ray frequency per linear millimeter; Id = Idioblasts: (-) not observed, (+) present, tall cells in rays with dark contents; Crys = Crystals: (-) not observed, (+) present in ray cells. Species marked with an asterisk need revision and may not fit the diagnosis of *Paraphyllanthoxylon*.

| Taxon                     | Specimens                                      | Age   | GR  | PP  | %S    | MVG | MTD     | VF    | Ty  | AP | 1-r | MR | RCC | MU  | RF      | Id | Crys |
|---------------------------|------------------------------------------------|-------|-----|-----|-------|-----|---------|-------|-----|----|-----|----|-----|-----|---------|----|------|
| <i>P. alabamense</i>      | W5, W11, W18, W19, W21, W24, W27, W28, W34     | Tu    | +/- | -   | 30-70 | 7   | 83–136  | 5–14  | 1/3 | 1  | +/- | 4  | 1   | 1   | 4.3–5.5 | -  | -    |
| <i>P. anasazii</i> *      | USNM 507032; TXSTATE 1205; YPM 30147, 30159    | Ca–Ma | -   | -   | 33-64 | 4   | 74–120  | 5–24  | 2   | 1  | +/- | 3  | 2   | 1   | 8.5     | -  | -    |
| <i>P. arizonense</i>      | USNM 42263; YPM 30151, 30155, 30156            | Ce–Ma | -   | -   | ?     | 4   | 143–184 | 6     | 1   | 1  | +   | 7  | 1   | 1/2 | 4       | -  | -    |
| <i>P. capense</i>         | SMB 9084/2                                     | Ca–Ma | -   | -   | ?     | 6   | 74      | 39    | 1   | 1  | -   | ?  | ?   | 2   | 7.5     | -  | -    |
| <i>P. idahoense</i>       | Henry Shaw Sch. of Bot. Coll. slides 1482-1484 | Ce    | -   | -   | ?     | 4   | 100     | ?     | 1   | 1  | -   | 4  | 1   | 2   | ?       | -  | -    |
| <i>P. obirensense</i>     | TK 98141                                       | Sa    | -   | -   | 52    | 5   | 96      | 27    | 2   | 1  | -   | 3  | 1   | ?   | ?       | -  | -    |
| <i>P. utahense</i>        | BYU 2190                                       | Al    | -   | -   | ?     | 5   | 93      | 12    | 2   | 1  | -   | 5  | 1   | 2   | 9.5     | -  | -    |
| <i>P. aff. utahense</i>   | 102/04                                         | Ce    | -   | -   | 29    | 5   | 84–95   | 20    | 1   | 1  | -   | 7  | 1   | 2   | ?       | -  | -    |
| <i>P. illinoisense</i> *  | SIPC 607.9 (and 9 others)                      | Ma    | -   | -   | low   | 8   | 118     | 22    | 2   | 1  | +   | 6  | 2   | 2   | ?       | -  | +    |
| <i>P. cf marylandense</i> | LPPU 1747                                      | Sa    | -   | -   | ?     | 6   | 60–200  | 29–47 | ?   | 1  | -   | 4  | 1   | 2   | 10.5    | -  | -    |
| <i>P. romanicum</i>       | U. of Cluj-Napoca Pbot. Coll. No. 439          | Ca–Ma | -   | -   | 12    | 9   | 86      | ?     | 1   | 1  | -   | 7  | 1   | 1/2 | ?       | -  | +    |
| <i>P. bacense</i> *       | G.I.R. 26357, 26358                            | Ma–Pa | -   | -/+ | ?     | 3   | ~105    | ~25   | 3   | 2  | +   | 3  | 1   | 2   | 15      | -  | +    |
| <i>P. sp.</i> *           | UNAM LPb No. 50                                | Ma    | -   | -   | 54    | 4   | 68      | 10    | ?   | 1  | -   | 5  | 2   | 1   | 10.5    | -  | -    |
| <i>P. vancouverense</i>   | Codon Coll. F-55441                            | Co    | -   | -   | 37    | 4   | 118     | 7     | 1   | 1  | -   | 4  | 1   | 1   | 8       | +  | -    |
| <i>A. halistichum</i>     | UPTN 259A                                      | Al    | -   | -   | ~20   | 3   | 193     | ?     | ?   | 1  | ?   | 4  | 1   | ?   | ?       | -  | -    |
| <b>Ferron log</b>         | UF 19462-69143                                 | Tu    | -   | -   | 30    | 11  | 137     | 6     | 1   | 1  | -   | 5  | 1   | 1   | 7.1     | -  | -    |

**Data file S1. Cretaceous angiosperm wood fossils used to create Fig. 1 (Excel file).** Location, identification, minimum diameter estimates, age, and citation information updated from (37). Abbreviations: Fm. = Formation, Gp. = Group, Ap. = Aptian, Al. = Albian, Ce. = Cenomanian, Tu. = Turonian, Co. = Coniacian, Sa. = Santonian, Ca. = Campanian, Ma. = Maastrichtian, Pa. = Paleocene, per = permineralization, char = charcoal.
